# Supplementary material for: The Effect of Oryza Sativa&nbsp;L. Subsp.&nbsp;Japonica&nbsp;Cultivar Yukihikari on The Immune System
Source: Research Square preprint supplement (doi:10.21203/rs.3.rs-111609/v1), 2020-11-25
Supplement: Supplementary file 1 [file cd14870d99cfbb72b9c0b264.pdf]

## Supplementary information

The effect of *Oryza sativa* L. subsp. *japonica* cultivar Yukihihikari on the immune system

Takahiro Adachi<sup>1,\*</sup>, Kunihiko Kotake<sup>1,2</sup>, Kosuke Tanimoto<sup>3</sup>, Shinya Munekata<sup>4</sup>,  
Kiyooki Kato<sup>5,\*</sup>

<sup>1</sup>Department of Immunology, Medical Research Institute, Tokyo Medical and Dental University, Tokyo, 113-8510, Japan

<sup>2</sup>Ichibiki CO., LTD. Nagoya, 456-0018, Japan

<sup>3</sup>Genome Laboratory, Medical Research Institute, Tokyo Medical and Dental University, Tokyo, 113-8510, Japan

<sup>4</sup> Rice Breeding Group, Kamikawa Agricultural Experiment Station, Local Independent Administrative Agency Hokkaido Research Organization, Minami 1-5, Pippu, Hokkaido, 078-0397, Japan

<sup>5</sup> Department of Agro-Environmental Science, Obihiro University of Agriculture and Veterinary Medicine, Nishi 2-11 Inada, Obihiro, Hokkaido 080-8555, Japan

\* Corresponding author

**Supplementary figure 1.** Effect of Yukihihari and Kirara397 on the proportions of B cells, CD4 T cells, CD8 T cells, DC, and activation markers on B and T cells *in vitro*. Spleen cells of C57BL/6 mice were cultured for 2 d with or without 20- $\mu$ g rice powder (Yukihihari or Kirara397). **(a)** The ratio of B cells (B220<sup>+</sup> cells) and CD4 T cells and CD8 T cells. **(b)** The ratio of DC (CD11<sup>+</sup>) cells, and **(c)** The ratio of activation marker CD86 on B cells and CD69 on B and T cells. The results of the two experiments are shown.

**Supplementary figure 2.** DNA microarray analysis of spleen cells treated with Yukihihari and Kirara397. Cells were prepared as shown in Suppl Fig.1 and total RNA was prepared and subjected to DNA microarray analysis. **(a)** Heat maps of expression levels between Yukihihari *versus* control. **(b)** Kirara397 *versus* control. **(c)** Yukihihari *versus* Kirara397. **(d)** The plot of expression levels between Yukihihari *versus* Kirara397, and **(e)** gene numbers significantly up- and down-regulated.

**Supplementary figure 3.** RNA sequencing analysis of spleen cells treated with Kirara397 and Yukihihari. Total RNA was prepared as shown in Supplementary Fig. 2 and subjected to RNA sequencing analysis. Differential expression volcano plots (Kirara397 *versus* control, Yukihihari *versus* control, and Yukihihari *versus* Kirara397) are shown. Red dots represent genes that are significantly upregulated and blue dots represent those that are significantly down-regulated. X-axis: log<sub>2</sub> fold change of gene expression. Y-axis: statistically significant difference of the differential expression in log<sub>10</sub> (p-value).

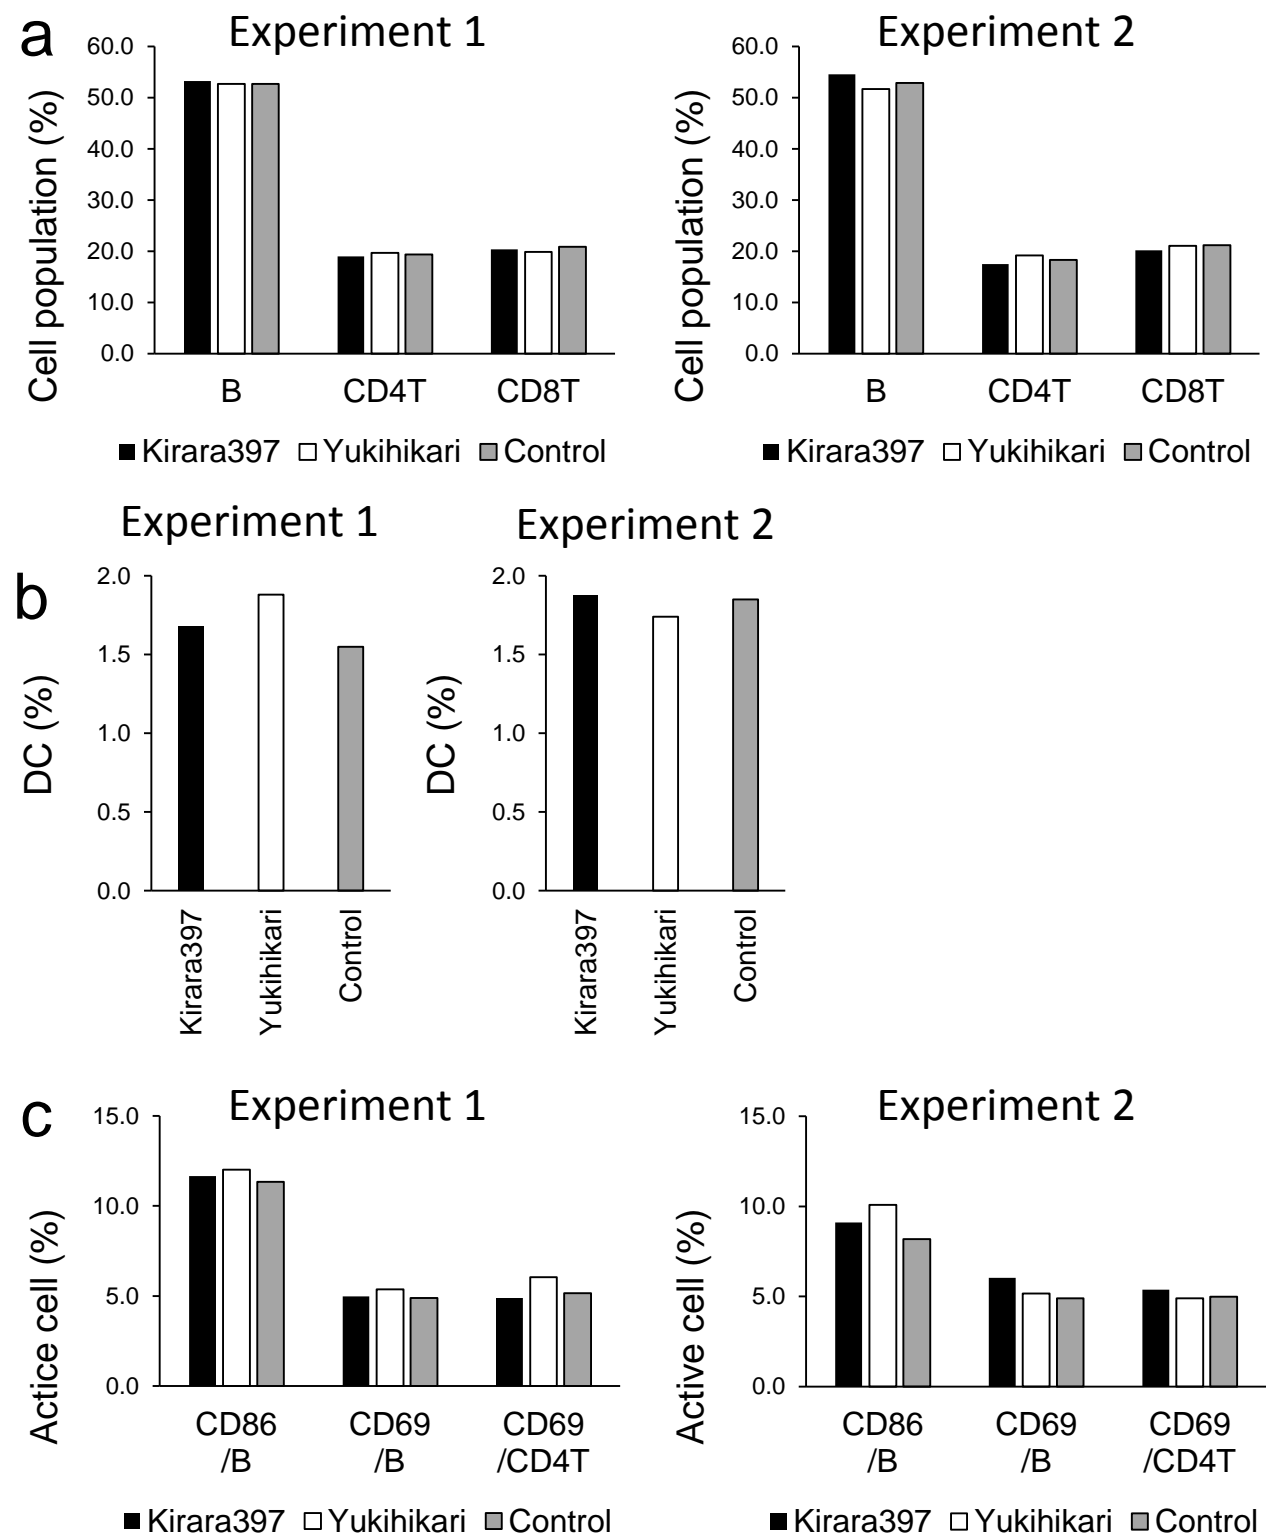

**Supplementary figure 1.** Effect of Yukihihari and Kirara397 on the proportions of B cells, CD4 T cells, CD8 T cells, DC, and activation markers on B and T cells *in vitro*. Spleen cells of C57BL/6 mice were cultured for 2 d with or without 20- $\mu$ g rice powder (Yukihihari or Kirara397). **(a)** The ratio of B cells (B220<sup>+</sup> cells) and CD4 T cells and CD8 T cells. **(b)** The ratio of DC (CD11<sup>+</sup>) cells, and **(c)** The ratio of activation marker CD86 on B cells and CD69 on B and T cells. The results of the two experiments are shown.

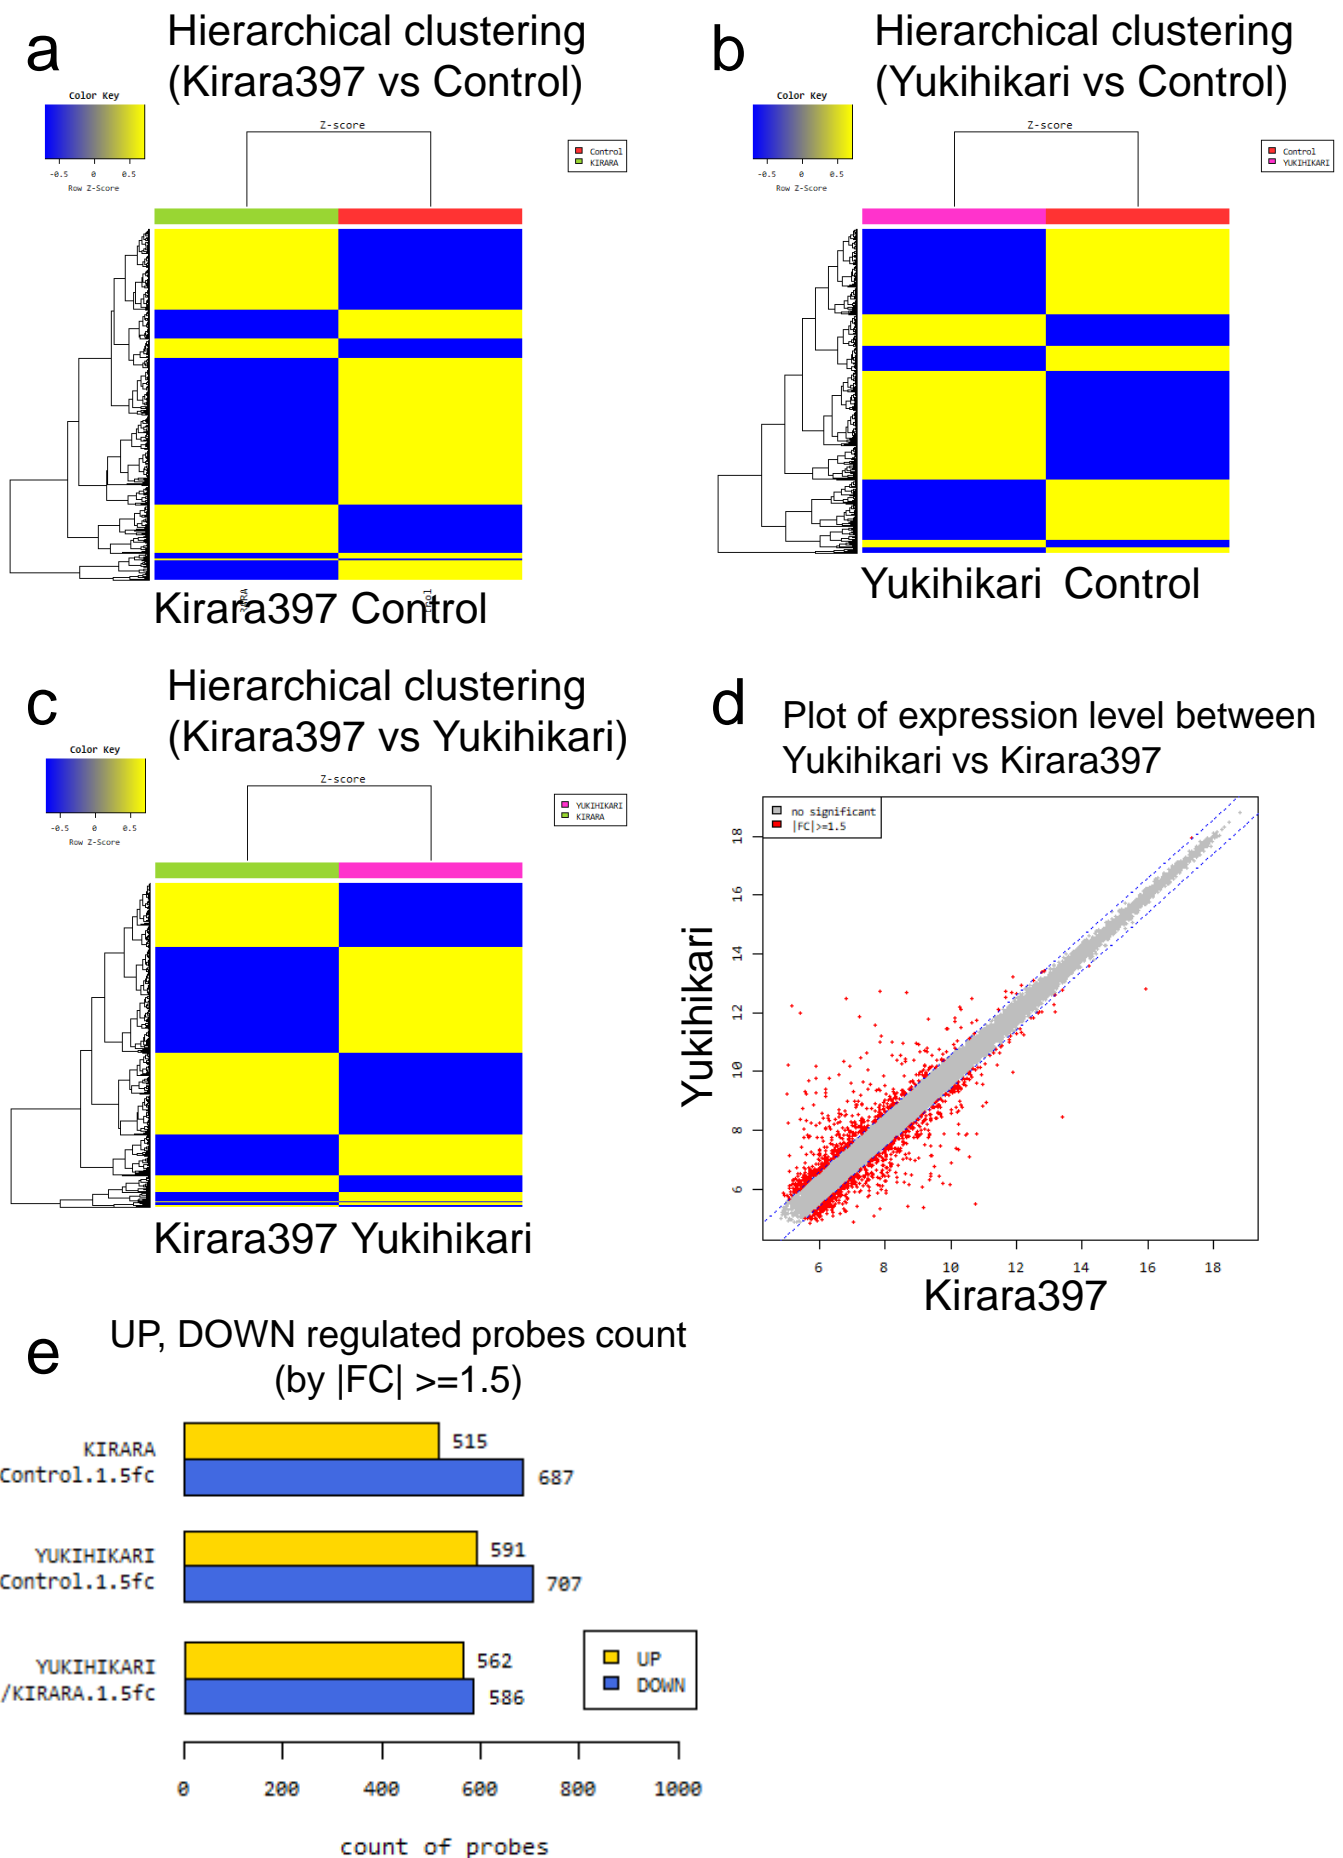

**Supplementary figure 2.** DNA microarray analysis of spleen cells treated with Yukihikari and Kirara397. Cells were prepared as shown in Suppl Fig.1 and total RNA was prepared and subjected to DNA microarray analysis. **(a)** Heat maps of expression levels between Yukihikari *versus* control. **(b)** Kirara397 *versus* control. **(c)** Yukihikari *versus* Kirara397. **(d)** The plot of expression levels between Yukihikari *versus* Kirara397, and **(e)** gene numbers significantly up- and down-regulated.

## Control vs Kirara397

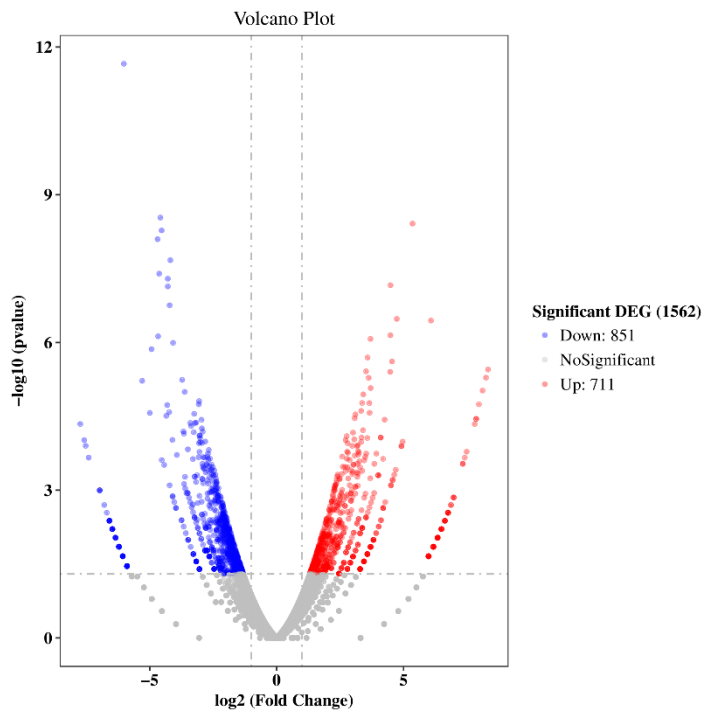

## Control vs Yukihihari

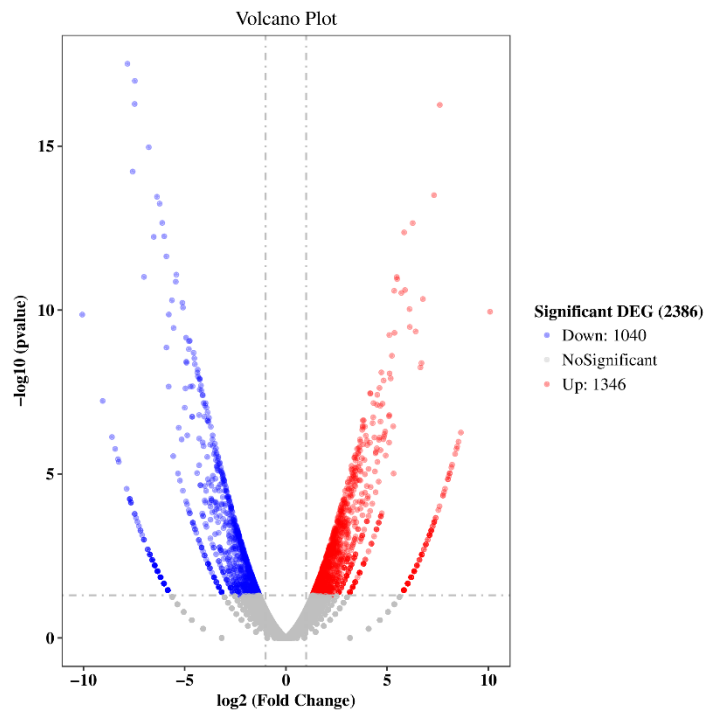

## Yukihihari vs Kirara397

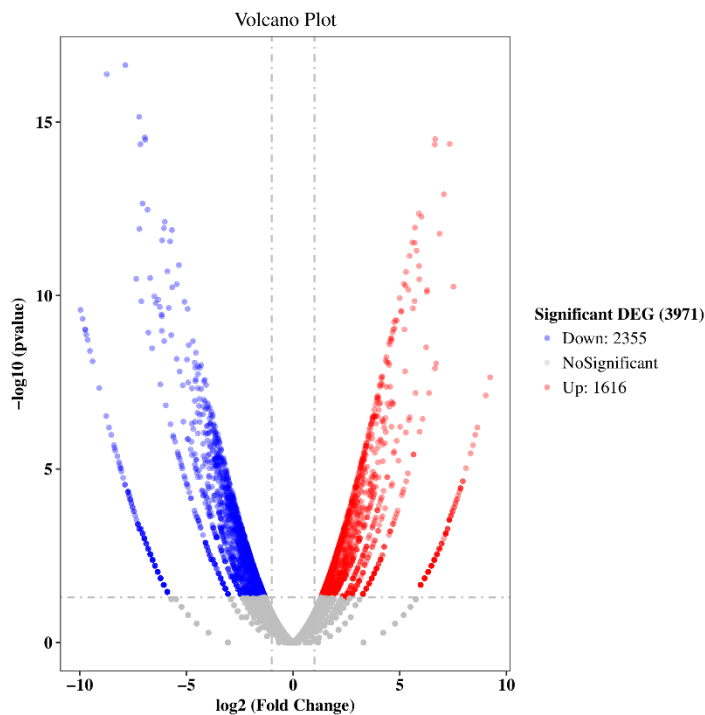

**Supplementary figure 3.** RNA sequencing analysis of spleen cells treated with Kirara397 and Yukihihari. Total RNA was prepared as shown in Supplementary Fig. 2 and subjected to RNA sequencing analysis. Differential expression volcano plots (Kirara397 *versus* control, Yukihihari *versus* control, and Yukihihari *versus* Kirara397) are shown. Red dots represent genes that are significantly upregulated and blue dots represent those that are significantly down-regulated. X-axis: log<sub>2</sub> fold change of gene expression. Y-axis: statistically significant difference of the differential expression in log<sub>10</sub> (p-value).
